# Supplementary material
Source: PubMed Central journal article supplement (PMC11105680)
Supplement: 18_2018_2928_MOESM1_ESM.pdf [file 18_2018_2928_MOESM1_ESM.pdf]

|           | 1                                                                                                                                 | 10   | 20   | 30   | 40   | 50   | 60   | 70   | 80   | 90   | 100  | 110  | 120  | 130  |
|-----------|-----------------------------------------------------------------------------------------------------------------------------------|------|------|------|------|------|------|------|------|------|------|------|------|------|
| Human     | MRHQGALLLLGALLCAHGLASSPECACGRSHFTCAVSALEGETCIPRAHQCDGNDGCDGSDSDGECILPTCSPLDFHCNGKCIIRRS4VCGDNDCEDDSDQDCPPRECEDEFPCQNGYCRSLMH      |      |      |      |      |      |      |      |      |      |      |      |      |      |
| House     | MRHQGALLLLGALLCAHGLASSPECACGRSHFTCAVSALEGETCIPRAHQCDGNDGCDGSDSDGECILPTCSPLDFHCNGKCIIRRS4VCGDNDCEDDSDQDCPPRECEDEFPCQNGYCRSLMH      |      |      |      |      |      |      |      |      |      |      |      |      |      |
| Zebrafish | MRLAAYLCGSLTFTLLAKGLVLSARECSGKNNHFTCAVSALEGETCIPRAHQCDGNDGCDGSDSDGECILPTCSPLDFHCNGKCIIRRS4VCGDNDCEDDSDQDCPPRECEDEFPCQNGYCRSLMY    |      |      |      |      |      |      |      |      |      |      |      |      |      |
| Consensus | ..\$rr.wgalllGallcAhG.aSs.EcACGrSHFTCAVSALEGETCIPRAHQCDGNDGCDGSDSDGECILPTCSPLDFHCNGKCIIRRS4VCGDNDCEDDSDQDCPPRECEDEFPCQNGYCRSLMH   |      |      |      |      |      |      |      |      |      |      |      |      |      |
| Human     | 131                                                                                                                               | 140  | 150  | 160  | 170  | 180  | 190  | 200  | 210  | 220  | 230  | 240  | 250  | 260  |
| House     | CDGNDGCDGNSDEQCQRKCSDFKRCSDGSCIAEHAYCDGTDCKDGSDEECPsAVPAPPcNLEEFQcAYGRcILOIYHCDGNDGCDGNSDESDCSsHOPCRsGFPHcD\$GLcTnAGNRCDGADCD     |      |      |      |      |      |      |      |      |      |      |      |      |      |
| Zebrafish | CDGNDGCDGNSDEQCQRKCSDFKRCSDGSCIAEHAYCDGTDCKDGSDEECPsAVPAPPcNLEEFQcAYGRcILOIYHCDGNDGCDGNSDESDCSsHOPCRsGFPHcD\$GLcTnAGNRCDGADCD     |      |      |      |      |      |      |      |      |      |      |      |      |      |
| Consensus | CDGNDGCDGNSDEQCQRKCSDFKRCSDGSCIAEHAYCDGTDCKDGSDEECPsAVPAPPcNLEEFQcAYGRcILOIYHCDGNDGCDGNSDESDCSsHOPCRsGFPHcD\$GLcTnAGNRCDGADCD     |      |      |      |      |      |      |      |      |      |      |      |      |      |
| Human     | 261                                                                                                                               | 270  | 280  | 290  | 300  | 310  | 320  | 330  | 340  | 350  | 360  | 370  | 380  | 390  |
| House     | QSDERNCITSNCTAEQFRCHSGRCVRLSMRCDGEDDCADNSDEENCENTGSPQCALDQFLCNGRCIGQRKLCNGVNDGCDNSDESPQONCRPRTEEMCNVNNGGCAQKQHVVRGAYQCTCTHTGYRLTE |      |      |      |      |      |      |      |      |      |      |      |      |      |
| Zebrafish | QSDERNCITSNCTAEQFRCHSGRCVRLSMRCDGEDDCADNSDEENCENTGSPQCALDQFLCNGRCIGQRKLCNGVNDGCDNSDESPQONCRPRTEEMCNVNNGGCAQKQHVVRGAYQCTCTHTGYRLTE |      |      |      |      |      |      |      |      |      |      |      |      |      |
| Consensus | QSDERNCITSNCTAEQFRCHSGRCVRLSMRCDGEDDCADNSDEENCENTGSPQCALDQFLCNGRCIGQRKLCNGVNDGCDNSDESPQONCRPRTEEMCNVNNGGCAQKQHVVRGAYQCTCTHTGYRLTE |      |      |      |      |      |      |      |      |      |      |      |      |      |
| Human     | 391                                                                                                                               | 400  | 410  | 420  | 430  | 440  | 450  | 460  | 470  | 480  | 490  | 500  | 510  | 520  |
| House     | DGHTCDQVNECAEEGYCSQGTCTEAGFQCACEAGYELRPDRRSCKALGPEVPLLFANRDIQRVLPHRSEYTLILLNLENRIALDFHRRLELFFMSDVTLDRLRANLNGSNVEEYVYVGLSEPGGLAY   |      |      |      |      |      |      |      |      |      |      |      |      |      |
| Zebrafish | DGHTCDQVNECAEEGYCSQGTCTEAGFQCACEAGYELRPDRRSCKALGPEVPLLFANRDIQRVLPHRSEYTLILLNLENRIALDFHRRLELFFMSDVTLDRLRANLNGSNVEEYVYVGLSEPGGLAY   |      |      |      |      |      |      |      |      |      |      |      |      |      |
| Consensus | DG.TCqVNECA#EGYCSQGTCT.EgAFQCACE..GYELRPDRRSCKALGPEVPLLFANRDIQRVLPHRSEYTLILLNLENRIALDFHRRLELFFMSDVTLDRLRANLNGSNVEEYVYVGLSEPGGLA!  |      |      |      |      |      |      |      |      |      |      |      |      |      |
| Human     | 521                                                                                                                               | 530  | 540  | 550  | 560  | 570  | 580  | 590  | 600  | 610  | 620  | 630  | 640  | 650  |
| House     | DHYHDKLYTDSGTSRIEYANLDGARRKVLQAQLKPRALIAHPHEGTYIYTDGNGPRTIEASSNDGSGRRIRIADTLFWPGLTIDYAGRRHYHVDKAKIHYTERADLNGSRKAYTSOGLPHFPFATY    |      |      |      |      |      |      |      |      |      |      |      |      |      |
| Zebrafish | DHYHDKLYTDSGTSRIEYANLDGARRKVLQAQLKPRALIAHPHEGTYIYTDGNGPRTIEASSNDGSGRRIRIADTLFWPGLTIDYAGRRHYHVDKAKIHYTERADLNGSRKAYTSOGLPHFPFATY    |      |      |      |      |      |      |      |      |      |      |      |      |      |
| Consensus | DH!H#KLYTDSGTSRIEYANLDGARRKVLQAQLKPRALIAHPHEGTYIYTDGNGPRTIEASSNDGSGRRIRIADTLFWPGLTIDYAGRRHYHVDKAKIHYTERADLNGSRKAYTSOGLPHFPFATY    |      |      |      |      |      |      |      |      |      |      |      |      |      |
| Human     | 651                                                                                                                               | 660  | 670  | 680  | 690  | 700  | 710  | 720  | 730  | 740  | 750  | 760  | 770  | 780  |
| House     | FEDSLYTDHAKTSINSANKFTGKNOETIRNKLHFPMDIHTLHPQRQPAK-NRCDGNDGGCTHLCLP\$GQNYTCACTGFRKISSHACQSLDKFLFARRDIIIRISFOTEDLSDVYIPLADYRSAVA    |      |      |      |      |      |      |      |      |      |      |      |      |      |
| Zebrafish | FEDSLYTDHAKTSINSANKFTGKNOETIRNKLHFPMDIHTLHPQRQPAK-NRCDGNDGGCTHLCLP\$GQNYTCACTGFRKISSHACQSLDKFLFARRDIIIRISFOTEDLSDVYIPLADYRSAVA    |      |      |      |      |      |      |      |      |      |      |      |      |      |
| Consensus | FEDSLYTDHAKTSINSANKFTGKNOE!IRNKLHFPMDIHTLHPQRQPAK.NRCDGNDGGCTHLCLP\$GQNYTCACTGFRKI.sHACQSLDKFLFARRDIIIRISFOTe!sDvYIPLADYRSAVA     |      |      |      |      |      |      |      |      |      |      |      |      |      |
| Human     | 781                                                                                                                               | 790  | 800  | 810  | 820  | 830  | 840  | 850  | 860  | 870  | 880  | 890  | 900  | 910  |
| House     | LQDMSRDDH---YIYTDVSTDTISRAKHADGTGQEVYVDTSLSPAGLADWYTNKLHYTDAGTORIEVANTDGSRTVLIENLDRPRDIIYVPHGGYHYTDGASPKTERAGHDASGRQVITSSNLTFP    |      |      |      |      |      |      |      |      |      |      |      |      |      |
| Zebrafish | LQDMSRDDH---YIYTDVSTDTISRAKHADGTGQEVYVDTSLSPAGLADWYTNKLHYTDAGTORIEVANTDGSRTVLIENLDRPRDIIYVPHGGYHYTDGASPKTERAGHDASGRQVITSSNLTFP    |      |      |      |      |      |      |      |      |      |      |      |      |      |
| Consensus | LQDMSRDDH..!YIYTDVSTDTISRAKHADGgQEVYVDTSLSPAGLADWYTNKLHYTDAGTORIEVANTDGSRTVLIENLDRPRDIIYVPHGGYHYTDGASPKTERAGHDAS.RqVITSSNLTFP     |      |      |      |      |      |      |      |      |      |      |      |      |      |
| Human     | 911                                                                                                                               | 920  | 930  | 940  | 950  | 960  | 970  | 980  | 990  | 1000 | 1010 | 1020 | 1030 | 1040 |
| House     | NGLAIDYGSQRLYHADAGKTIIEFAGLDGSKRKLIGSQLPHPFGLTYGRIYATDQKTSIQSADRLTGLDRETLQENLEMLMDZHVFHRRPPVSTPCAVENGGCSHLCLRSPPN\$GFSCTCPTGIN    |      |      |      |      |      |      |      |      |      |      |      |      |      |
| Zebrafish | NGLAIDYGSQRLYHADAGKTIIEFAGLDGSKRKLIGSQLPHPFGLTYGRIYATDQKTSIQSADRLTGLDRETLQENLEMLMDZHVFHRRPPVSTPCAVENGGCSHLCLRSPPN\$GFSCTCPTGIN    |      |      |      |      |      |      |      |      |      |      |      |      |      |
| Consensus | NGLAIDYgs#RLYHADAgKTIIE\$agLDGSKRKLIGSQLPHPFGLTYg#RIYATDQKTSIQSADRLTGLDRETLQENLEMLMDZHvFHR.RppV.T.Cav#GGCSHLCLRSPPn\$GFSCTCPTGIN  |      |      |      |      |      |      |      |      |      |      |      |      |      |
| Human     | 1041                                                                                                                              | 1050 | 1060 | 1070 | 1080 | 1090 | 1100 | 1110 | 1120 | 1130 | 1140 | 1150 | 1160 | 1170 |
| House     | LLSDGKTCSPGNSFLIFARRIDIRHYSLDIPYFADYVVPINHTKNTIAIGVDPQEGKYVYSDSTLHRISRANLDSQHEIDIITGLQTTDGLAYDAIGRKYIYTDGTNRIEYVGNLDSGRKVLVYQN    |      |      |      |      |      |      |      |      |      |      |      |      |      |
| Zebrafish | LLSDGKTCSPGNSFLIFARRIDIRHYSLDIPYFADYVVPINHTKNTIAIGVDPQEGKYVYSDSTLHRISRANLDSQHEIDIITGLQTTDGLAYDAIGRKYIYTDGTNRIEYVGNLDSGRKVLVYQN    |      |      |      |      |      |      |      |      |      |      |      |      |      |
| Consensus | LL.DGKTCspgNSFLIFARRID!RHISLDIPYFADYVvpIN.HKNTIAIGVDPQ.EGKYVYSDSTLhrISraN!#GS#HEIDIITGLQTTDGLAYDAIGRKYIYTDGTNRIEYVGNLDSGRKVLVYQN  |      |      |      |      |      |      |      |      |      |      |      |      |      |
| Human     | 1171                                                                                                                              | 1180 | 1190 | 1200 | 1210 | 1220 | 1230 | 1240 | 1250 | 1260 | 1270 | 1280 | 1290 | 1300 |
| House     | LDSPRRIYLYHEHGFMYATDGENAKLERSGNDGSDRAVLIENNLGMPNGLTYDKASSQLLWADHATERJEARDLNGANRHTLYSPVQHPYGLTLD\$YIYTDQKTSIRHRADKGTGSNVILVRSNLP   |      |      |      |      |      |      |      |      |      |      |      |      |      |
| Zebrafish | LDSPRRIYLYHEHGFMYATDGENAKLERSGNDGSDRAVLIENNLGMPNGLTYDKASSQLLWADHATERJEARDLNGANRHTLYSPVQHPYGLTLD\$YIYTDQKTSIRHRADKGTGSNVILVRSNLP   |      |      |      |      |      |      |      |      |      |      |      |      |      |
| Consensus | LDSPRRIYLYHEHGFMYATDGENAKLERSGNDGSDR.VLIENNLGMPNGLYDkAsQLLWADHATERJEAaDLNGANRHTLYSPVQHPYGLTLD\$YiYTDQKTSIRHRADK.GTGSNV!ILRSNLP    |      |      |      |      |      |      |      |      |      |      |      |      |      |
| Human     | 1301                                                                                                                              | 1310 | 1320 | 1330 | 1340 | 1350 | 1360 | 1370 | 1380 | 1390 | 1400 | 1410 | 1420 | 1430 |
| House     | LHDHQYDRAQPLGFNCKGSRNGGCSHLCLPRPSGFSACPTGTQLKGDGRKTCOPSPETYLFFSSRGSIRISLSDTDHTDHYVHPVPELNNVYISLDYSDVGGKYVYTDVLDVIRRADLNGSNMTEYIGR |      |      |      |      |      |      |      |      |      |      |      |      |      |
| Zebrafish | LHDHQYDRAQPLGFNCKGSRNGGCSHLCLPRPSGFSACPTGTQLKGDGRKTCOPSPETYLFFSSRGSIRISLSDTDHTDHYVHPVPELNNVYISLDYSDVGGKYVYTDVLDVIRRADLNGSNMTEYIGR |      |      |      |      |      |      |      |      |      |      |      |      |      |
| Consensus | LHDIQYDRAqPLGfNCKGSRNGGCSHLCLPRNGTSCACPTG!qLKGdgrKTCOPSPETYLFFSNRYSIRISLSDTDHTDHYVHPVPELNNVYISLDYSDVGRKYVYTDVLDVIRRADLNGSNMTEYIGS |      |      |      |      |      |      |      |      |      |      |      |      |      |
| Human     | 1431                                                                                                                              | 1440 | 1450 | 1460 | 1470 | 1480 | 1490 | 1500 | 1510 | 1520 | 1530 | 1540 | 1550 | 1560 |
| House     | GLKTTDGLAVDYMARNLYTDTGRNTJEASRLDGSCRKVLINNSLDEPRAIYVPRKGYLFWTDGHIJAKIERANLDGSEKRYLINTDLGMPNGLTDYDTRTRYHVAHLDRIESAIDLNGKLRQVLSH    |      |      |      |      |      |      |      |      |      |      |      |      |      |
| Zebrafish | GLKTTDGLAVDYMARNLYTDTGRNTJEASRLDGSCRKVLINNSLDEPRAIYVPRKGYLFWTDGHIJAKIERANLDGSEKRYLINTDLGMPNGLTDYDTRTRYHVAHLDRIESAIDLNGKLRQVLSH    |      |      |      |      |      |      |      |      |      |      |      |      |      |
| Consensus | GLKTTDGLAVDYMARNLYTDTGRNTJEASRLDGScRKVLINNSLDEPRAIYVPRK%LFWTDGHIJAKIERANLDGSERKRYLINTDLGMPNGLTDYDTRTRYHVAHLDRIESAIDLNGKLRQV!L\$H  |      |      |      |      |      |      |      |      |      |      |      |      |      |
| Human     | 1561                                                                                                                              | 1570 | 1580 | 1590 | 1600 | 1610 | 1620 | 1630 | 1640 | 1650 | 1660 | 1670 | 1680 | 1690 |
| House     | YSHPFALTQQDRHIYATDQKTSIQRVYKSGRNKETVLYANVEGLMDIIVVSPQRGTGNAcGVNNGGCTHLCFARRSDFVACPDPEPSRPSCLVPLVPPAPRATGHESEKSPVLPNTPTTLYSSTTR    |      |      |      |      |      |      |      |      |      |      |      |      |      |
| Zebrafish | YSHPFALTQQDRHIYATDQKTSIQRVYKSGRNKETVLYANVEGLMDIIVVSPQRGTGNAcGVNNGGCTHLCFARRSDFVACPDPEPSRPSCLVPLVPPAPRATGHESEKSPVLPNTPTTLYSSTTR    |      |      |      |      |      |      |      |      |      |      |      |      |      |
| Consensus | YSHPFALTQQDRHIYATDQKTSIQRVYKSGRNKETVLYANVEGLMDIIVVSPQRGTGNAcGVNNGGCTHLCFARRSDF!CACPDPEsRPSCL!pGLVPPaPrat.n.eksPvlpnt.pttl.ssttk   |      |      |      |      |      |      |      |      |      |      |      |      |      |
| Human     | 1691                                                                                                                              | 1700 | 1710 | 1720 | 1730 | 1740 | 1750 | 1760 | 1770 | 1780 | 1790 | 1800 | 1810 | 1820 |
| House     | TRTSLEEYEGKSERDARLGLCARSDNAYPAAPGEGHLSYRIGGLSILLLVVIAALMLYRHKSKFDPGNGMLTYSNPSYRTSTQEVKIEAIPKPAHYNQLCYKKE--GGPDHNYTKEKIKIVEGI      |      |      |      |      |      |      |      |      |      |      |      |      |      |
| Zebrafish | TRTSLEEYEGKSERDARLGLCARSDNAYPAAPGEGHLSYRIGGLSILLLVVIAALMLYRHKSKFDPGNGMLTYSNPSYRTSTQEVKIEAIPKPAHYNQLCYKKE--GGPDHNYTKEKIKIVEGI      |      |      |      |      |      |      |      |      |      |      |      |      |      |
| Consensus | TrtsLe.v.grCsEr#a.LglCa.sN.a!p!PaPgEgH!SYaIGGLSILLV.VIAALMLYRHKSKfDPGngMLTYSNPSYRTSTQEVKIEaapKPA.ynQLCYKKE..GgpDH.YTKEKIKIVEG!    |      |      |      |      |      |      |      |      |      |      |      |      |      |
| Human     | 1821                                                                                                                              | 1830 | 1840 | 1850 | 1860 | 1870 | 1880 | 1890 | 1900 | 1910 | 1914 |      |      |      |
| House     | CLLSGDDEADDLKQLRSSRGLLRDHYCNKTDYTSQSSGSLDDTETEQLLQE--EQSECSVYHARTPERRGSLPDTGAKHERKLSSESQV                                         |      |      |      |      |      |      |      |      |      |      |      |      |      |
| Zebrafish | CLLSGDDEADDLKQLRSSRGLLRDHYCNKTDYTSQSSGSLDDTETEQLLQE--EQSECSVYHARTPERRGSLPDTGAKHERKLSSESQV                                         |      |      |      |      |      |      |      |      |      |      |      |      |      |
| Consensus | cLLSgdDeaDmLkQLrSSRgLLRDhYCNkT#YSYQSSgSL#dTEtEQLLQE..eQSECSs!Hta!PprrGSLPDTGAKHRKLSSESQV                                          |      |      |      |      |      |      |      |      |      |      |      |      |      |

Supplemental Figure S1
