# Supplementary material
Source: PubMed Central journal article supplement (PMC11105680)

Species: *Homo sapiens* *Mus musculus* *Danio rerio*

Region I 107-739 AA

107-739 AA

109-742 AA

Overlay

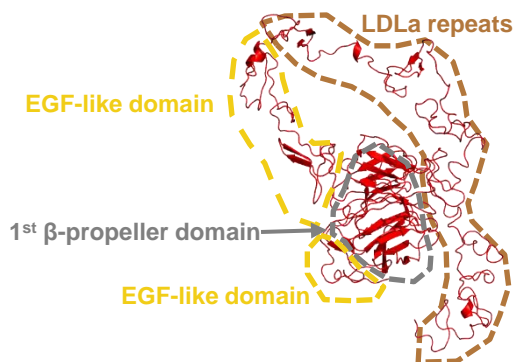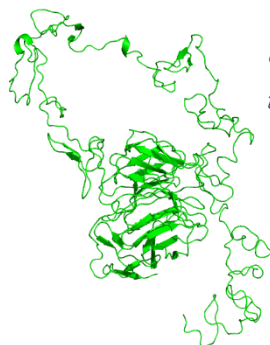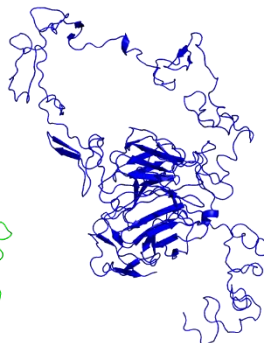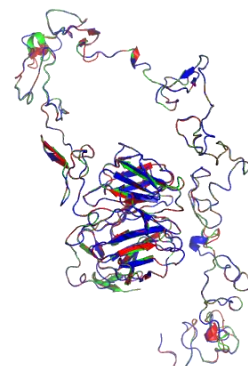

Region II: 440-1043 AA

440-1043 AA

442-1048 AA

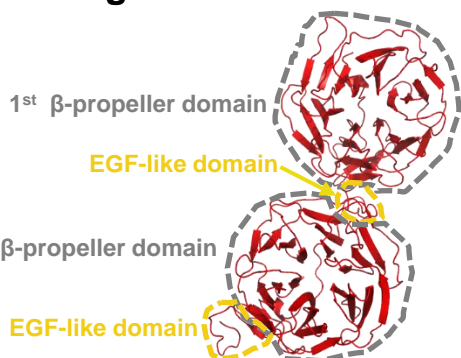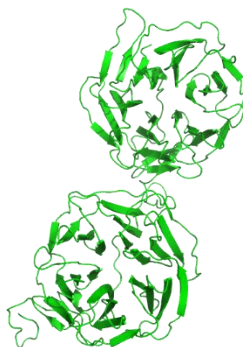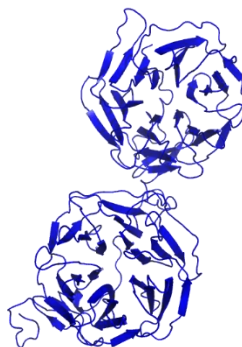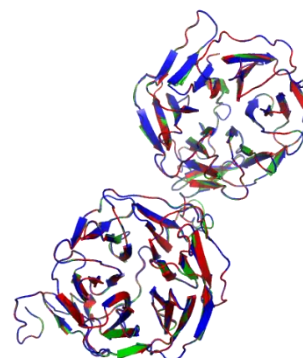

Region III: 1050-1640 AA

1050-1640 AA

1055-1645 AA

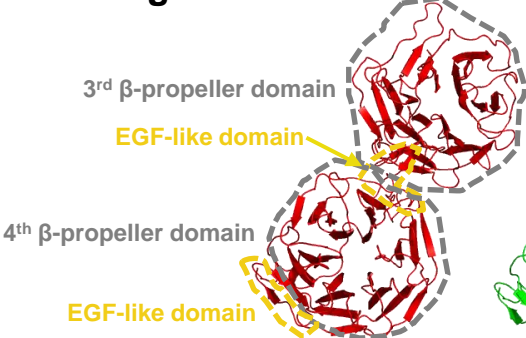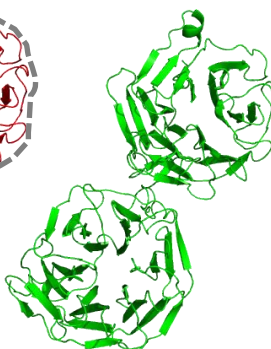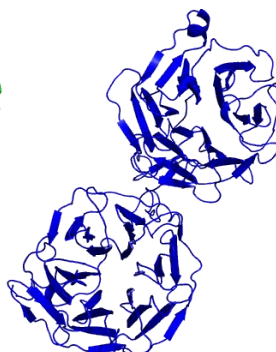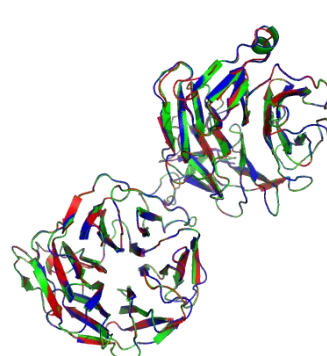

Supplement: 18_2018_2928_MOESM2_ESM.pdf [file 18_2018_2928_MOESM2_ESM.pdf]
