# Supplementary material
Source: PubMed Central journal article supplement (PMC11105680)

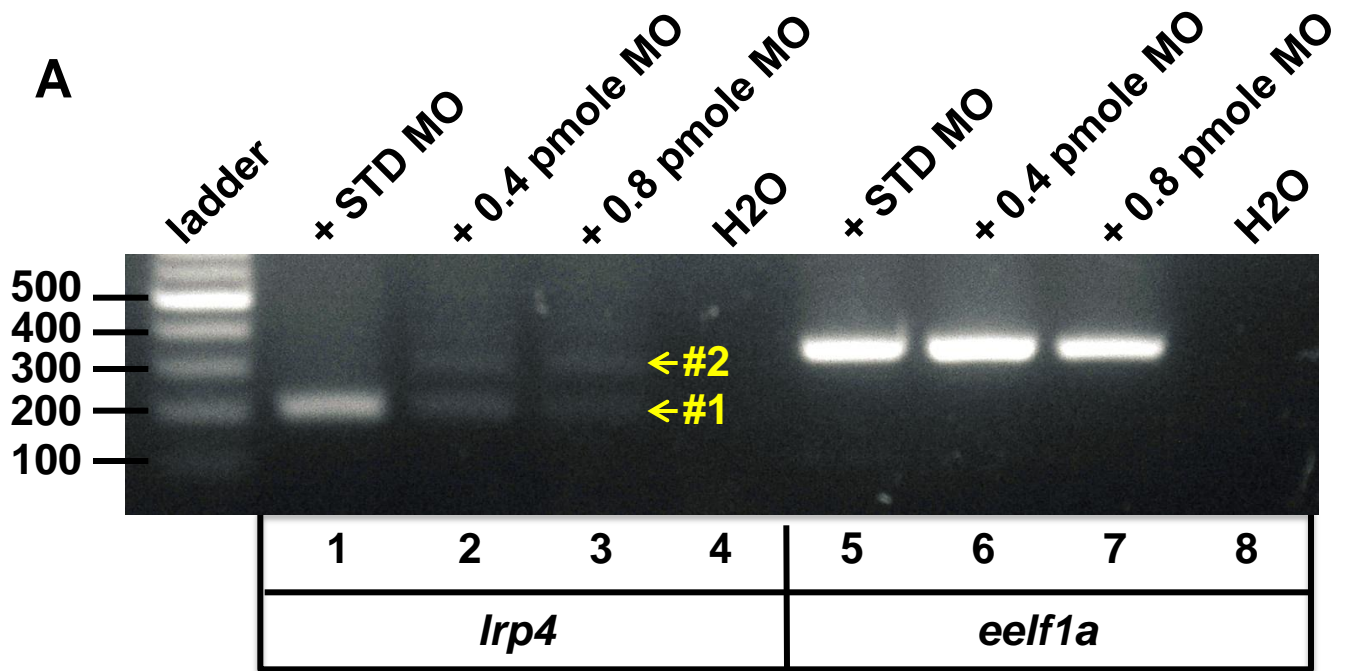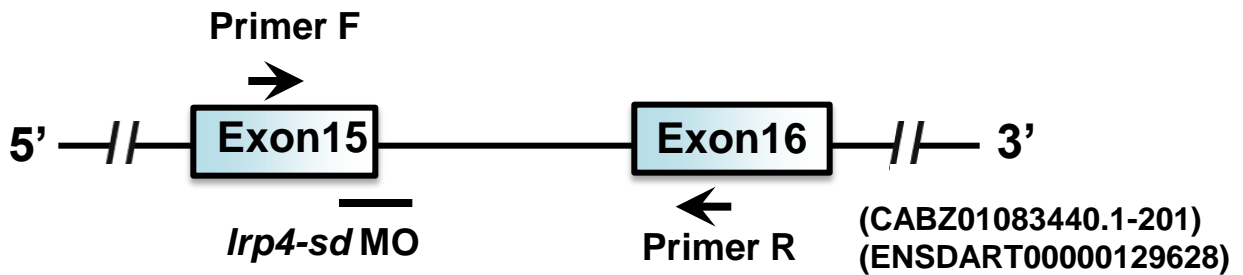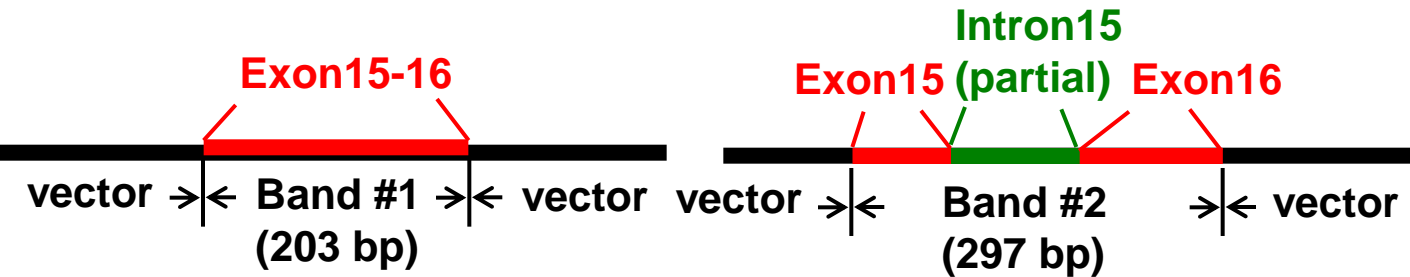

Band #1 cloning, insert: 203 bp

```

GGCCGCCAGTGTGATGGATATCTGCAGAATTCG
CCCTTAAAACCAAGAGGTCATCCGAAACAAGCT
GCATTTCCCATGGACATCCACACGCTGCATCCT
CAGAGGCAGCCTGCAGGTGGCATAAACCGCTGT
GGGAGCAATAATGGCGGCTGCAGTCACCTGTGT
TTGCCAGCAACAAAACATACACCTGTGTGTGC
CTACAGGCTTCAGAAAGCTGGACCAGCATAACT
GTGCCAGAAAGGGCGAATTCCAGCACACTGGC
GGCCGTTACTAGTGGATC
  
```

Band #2 cloning, insert: 297 bp

```

GGCCGCCAGTGTGATGGATATCTGCAGAATTCGCCC
TTAAAACCAAGAGGTCATCCGAAACAAGCTGCATT
CCCCATGGACATCCACACGCTGCATCCTCAGAGGCA
GCCTGCAGGTCAGATCAACAACACTGATATTGTGCA
GAAATTCCCAAAACATACCTGTCCATTCAACTCAGT
GCAGTTTCAGCAGAAATGTACTACTAAAGGTGGCAT
AAACCGCTGTGGGAGCAATAATGGCGGCTGCAGTC
ACCTGTGTTTGGCCAGCAACAAAACATACACCTGTG
TGTGTCTACAGGCTTCAGAAAGCTGGACCAGCATA
ACTGTGCCAGAAAGGGCGAATTCCAGCACACT
  
```

**B**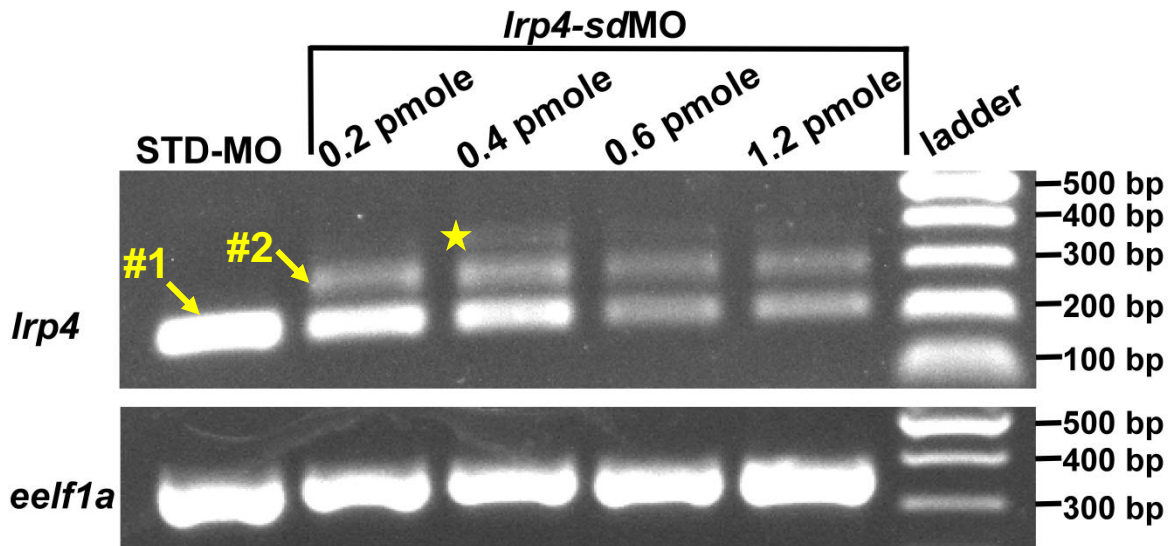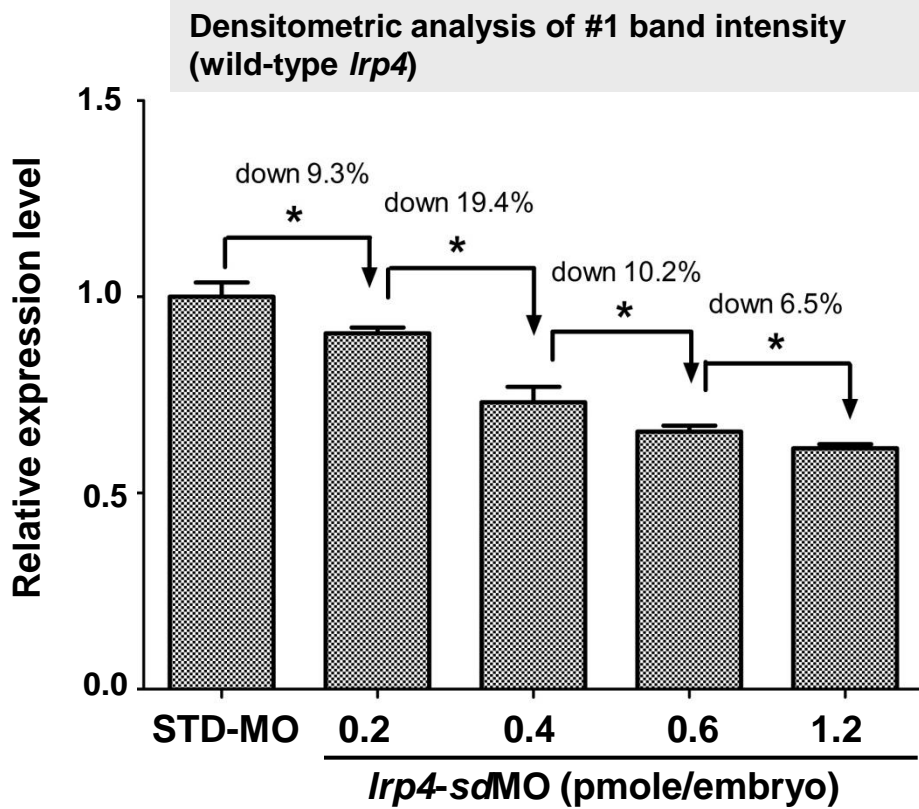

**C****qRT-PCR of mis-spliced *Irp4***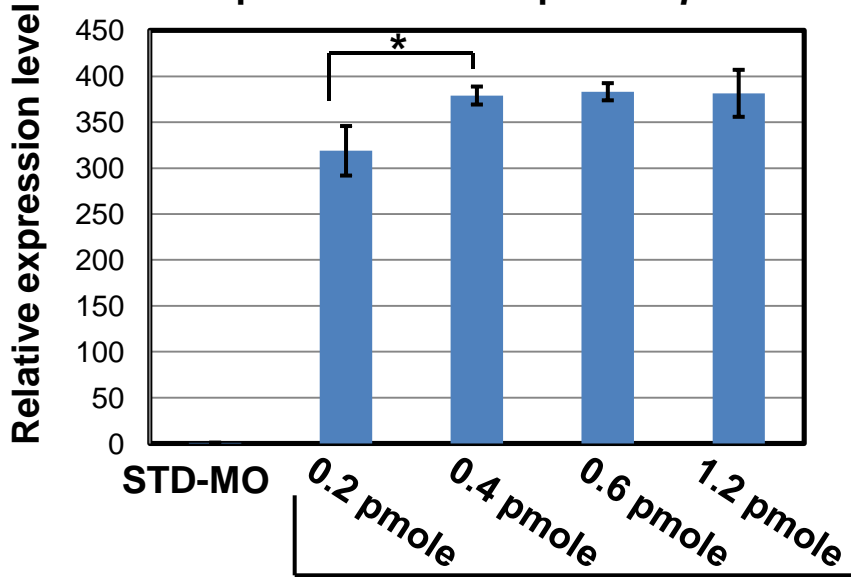***Irp4*-sdMO**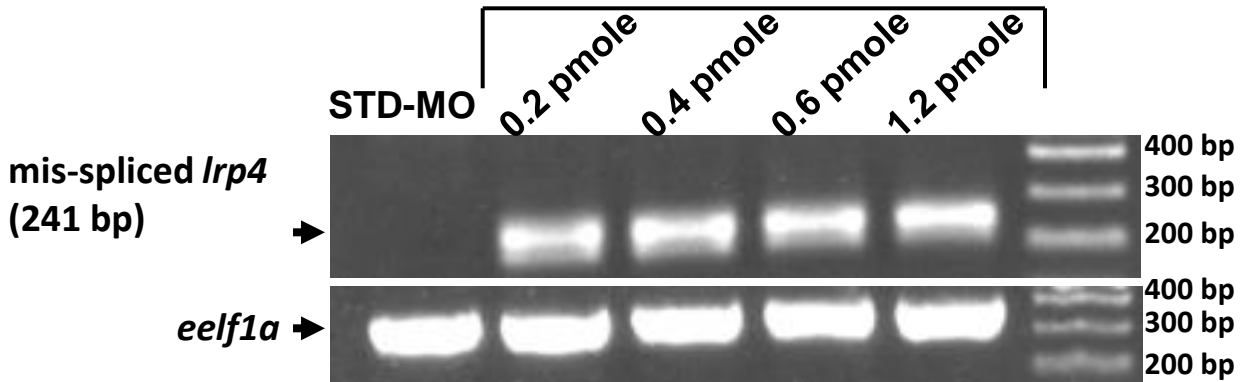

Supplement: 18_2018_2928_MOESM3_ESM.pdf [file 18_2018_2928_MOESM3_ESM.pdf]
