# Supplementary material
Source: PubMed Central journal article supplement (PMC11105680)
Supplement: 18_2018_2928_MOESM6_ESM.pdf [file 18_2018_2928_MOESM6_ESM.pdf]

**Table S2. Sequences of genomic sequencing primers, 5'-RACE primers, siRNAs and quantitative RCR primers**

**Genomic DNA primer sequences**

| <b>Gene</b> | <b>Exon</b> | <b>primer</b> | <b>sequence</b>       | <b>Product size [bp]</b> |
|-------------|-------------|---------------|-----------------------|--------------------------|
| LRP4        | E1          | forward       | GCTCTGGCAGCACTGGAG    | 586                      |
|             |             | reverse       | TCTTCGCACGCATTCATTC   |                          |
|             | E2          | forward       | GTGACTCTCCAGGTGACAGTG | 389                      |
|             |             | reverse       | CAAGCTTGCAAAAGACCAAC  |                          |
|             | E3          | forward       | CTGGCCTAGTTGAGCCTGAG  | 237                      |
|             |             | reverse       | CCTTTCCCAGTGGA ACTCAA |                          |
|             | E4          | forward       | GCTTCCAGGCACCAGACC    | 250                      |
|             |             | reverse       | GGCCATTGCTGCTATCTTCT  |                          |
|             | E5          | forward       | GGAGTCAGAGAGGAGGGTGA  | 239                      |
|             |             | reverse       | ACTGTCTGCCCTCATCCAAC  |                          |
|             | E6-7        | forward       | ATCCAGGCCTGAGTGTGTG   | 578                      |
|             |             | reverse       | GCTCCACAAGCCTTCTCCTT  |                          |
|             | E8          | forward       | GTGGCAGGGAGAATTCAGG   | 245                      |
|             |             | reverse       | CACCCTTCCACCCCAACTAT  |                          |
|             | E9-10       | forward       | GAAAATGACAGGCTCCCATC  | 595                      |
|             |             | reverse       | GAAACACAGCTGCCTGTCTG  |                          |
|             | E11         | forward       | GAGTGGGAGGACGACAGAAG  | 240                      |
|             |             | reverse       | AGTACCTGGCCTTCCTCCAT  |                          |
|             | E12         | forward       | GACCTGCTGATGGGTACCAG  | 400                      |
|             |             | reverse       | GTCCTGCTGCCTAAGGTTTG  |                          |

|        |         |                         |     |
|--------|---------|-------------------------|-----|
| E13    | forward | TTGCTTCCTGTAAGAGTTTGCTC | 298 |
|        | reverse | GAGCTGTCCCGAGAGGTTG     |     |
| E14-15 | forward | TGTTTTCTGCTGCCCACTTC    | 670 |
|        | reverse | AGGAAGGTTCTCAGAGGCAC    |     |
| E16    | forward | CACTTTTGCAGACCTTCGCT    | 237 |
|        | reverse | CCCTTGTTCCCTTCTCCCAT    |     |
| E17-18 | forward | GTGAGCGTCTGTGTCTGTCA    | 594 |
|        | reverse | GCTCCTTCTATCTGAGGCCA    |     |
| E19    | forward | GCCATGGAAGGTAAGAGGGT    | 223 |
|        | reverse | CTCAGATCTTGGGAGGGGTG    |     |
| E20    | forward | AACTAGCTTGTAAGACCTGCC   | 299 |
|        | reverse | AGGCTGTGGGAAGATGTTTT    |     |
| E21-22 | forward | GAGCTCTTTGCCACTGCTCT    | 591 |
|        | reverse | AGCAGCAGGACTCATGGTTT    |     |
| E23    | forward | TTAATGGCTGTGCTCGAGTG    | 235 |
|        | reverse | AAGGGCAGGGACAGAAGG      |     |
| E24-25 | forward | TTGTAGGCGGTGAGGGTCTA    | 484 |
|        | reverse | CCACCTTTACCCCGTCATAA    |     |
| E26-27 | forward | GGTATGTGGTAGCTGCTGGAA   | 687 |
|        | reverse | ACAGGTCACCGTCTTTCTGG    |     |
| E28    | forward | GATGTTCCAGGCTAGGTGTGA   | 398 |
|        | reverse | GCGACCAGAAGCAAATCTGT    |     |
| E29-30 | forward | GGGTCAGTCTGGTTGCTCAT    | 584 |
|        | reverse | CTTCTGCCACCCGATTT       |     |

|        |         |                           |     |
|--------|---------|---------------------------|-----|
| E31    | forward | AGGAGGGGACAAACAGGTTC      | 250 |
|        | reverse | CCCAAAGAAACATCCCAGTC      |     |
| E32-33 | forward | CACATGGTGAGGCACAGAAG      | 678 |
|        | reverse | CTGACTCTCAGCCCTTCCAG      |     |
| E34    | forward | GGCCATATGTAGATGTTTATGGTTC | 250 |
|        | reverse | TCATGGGATGGTGATTTGAA      |     |
| E35    | forward | CTTTCCCCCTTTCCTGGAG       | 246 |
|        | reverse | ATCAACCCCAGAGTCCCAAT      |     |
| E36    | forward | ACACCAGCACCGCTAGAAAG      | 234 |
|        | reverse | CAGTGAAGTGCAGAGCTTCG      |     |
| E37    | forward | TCCCAGGTATCATCCCCTTA      | 245 |
|        | reverse | ACACCTCGCCAAAAAGACC       |     |
| E38    | forward | CCCATCCACTTCCTTTTCA       | 485 |
|        | reverse | GCGAGCACAAGGACTAGACG      |     |

---

### 5'RACE primers

| Name                    | sequence                                                        |
|-------------------------|-----------------------------------------------------------------|
| 5'RACE reverse primer-1 | TTCACAGCCTTCTTCATCGCTGCCGTCCGAGCAGTCGTCC                        |
| 5'RACE reverse primer-2 | AAGCGCACACATCGGCCGGACATACAGCGAAACTGATCCGCCATAC<br>ACATGGACGTGCT |

---

### siRNAs sequences

| Gene name | description | sequence |
|-----------|-------------|----------|
|-----------|-------------|----------|

---

|            |         |                       |
|------------|---------|-----------------------|
| LRP4-siRNA | forward | GCGAUGAGGAUGGAUGUAUTT |
|            | reverse | AUACAUCCAUCCUCAUCGCTT |

### Human cDNA primer sequences used for Quantitative PCR

| Gene          | primer  | sequence               |
|---------------|---------|------------------------|
| <i>LRP4</i>   | forward | GTTCCAATGACGCTGTTCT    |
|               | reverse | CCAATGGCGTAGCTGATATG   |
| <i>NOTCH1</i> | forward | GGCAATCCGAGGACTATGAG   |
|               | reverse | CTCAGAACGCACTCGTTGAT   |
| <i>NOTCH2</i> | forward | TGGTGGCAGAACTGATCAAC   |
|               | reverse | CTGCCCAGTGAAGAGCAGAT   |
| <i>JAG1</i>   | forward | GAATGGCAACAAAACCTTGCAT |
|               | reverse | AGCCTTGTCGGCAAATAGC    |
| <i>JAG2</i>   | forward | TCATCCCCTTCCAGTTCG     |
|               | reverse | ATGCGACACTCGCTCGAT     |
| <i>HES1</i>   | forward | GAAGCACCTCCGGAACCT     |
|               | reverse | GTCACCTCGTTCATGCACTC   |
| <i>GAPDH</i>  | forward | TGAACCACCAACTGCTTAGC   |
|               | reverse | GGCGACTGTGGTCATGAG     |

### Mouse cDNA primer sequences used for Quantitative PCR

| Gene        | primer  | sequence           |
|-------------|---------|--------------------|
| <i>Lrp4</i> | forward | ACCAAGACCCGCACCTCT |

|               |         |                             |
|---------------|---------|-----------------------------|
|               | reverse | CTGGGCATCCCTTTCAGA          |
| <i>Jag1</i>   | forward | TGGCCGAGGTCCTACACTT         |
|               | reverse | GCCTTTTCAATTATGCTATCAGG     |
| <i>Jag2</i>   | forward | CTTTCACCCTCATCGTGGA         |
|               | reverse | TCAGCAGCTCCTCATCTGG         |
| <i>Notch1</i> | forward | GGATGCTGACTGCATGGAT         |
|               | reverse | AATCATGAGGGGTGTGAAGC        |
| <i>Notch2</i> | forward | CCATTTCAAGTGTTTCGTGTCC      |
|               | reverse | CACATTCATCGATGTTCTCTTCA     |
| <i>Hes1</i>   | forward | TGCCAGCTGATATAATGGAGAA      |
|               | reverse | CCATGATAGGCTTTGATGACTTT     |
| <i>Gapdh</i>  | forward | AGC TTG TCA TCA ACG GGA AG  |
|               | reverse | TTT GAT GTT AGT GGG GTC TCG |

---

**Zebrafish cDNA primer sequences used for Quantitative PCR**

| Gene                                                      | primer  | sequence              |
|-----------------------------------------------------------|---------|-----------------------|
| <i>lrp4</i>                                               | forward | ATCCCGGCGTGAGTAACC    |
|                                                           | reverse | TGTGCGGTCTCGATCTTCA   |
| <i>lrp4</i> (e <sup>15</sup> i <sup>15</sup> mis-spliced) | forward | CCTGTCCATTCAACTCAGTGC |
|                                                           | reverse | TCTGTGGTGTCGAAGCTGAT  |

|                |         |                           |
|----------------|---------|---------------------------|
| <i>pax2a</i>   | forward | GGTCAGAGGGATTGAAGATGGATAC |
|                | reverse | GTGGATGTCCGCTGTTGCTT      |
| <i>wt1a</i>    | forward | CCACACCCGGACACATACAG      |
|                | reverse | TCTGACCTGGCAAACCTTCTTCT   |
| <i>wt1b</i>    | forward | CGAGGCTCGGACCAGAGT        |
|                | reverse | CGGTGGCTCAGTGGTTTGC       |
| <i>nephrin</i> | forward | CGGTGTTCTGTTCCCTCCTGAA    |
|                | reverse | GCTGCTGGTGTTCCTTTC        |
| <i>podocin</i> | forward | CGAGAGGAGTTATTAGCATTATTGG |
|                | reverse | ACTCCAAGGTATTTCTTCTTTAGGC |
| <i>wispla</i>  | forward | CGGCCCTGCAATGTGGATA       |
|                | reverse | TTGAGGCTTCTCTGCTCTGTAG    |
| <i>furina</i>  | forward | ACAAGCTGATGCTGTTGAGG      |
|                | reverse | CACAGCAGGCCGCTAAAT        |
| <i>grip1</i>   | forward | AGGTCATCATCATCGACAAGG     |
|                | reverse | CATGCAGAGCACACACCTA       |
| <i>itga3</i>   | forward | TGCAGGGCTCCACCATTATAGG    |
|                | reverse | GGACTTTCACACCTTGGTACTTTG  |
| <i>fras1</i>   | forward | GCAGTGCCTCAGCAAATGT       |
|                | reverse | TCCTTACATGATGGATGACAAGA   |
| <i>frem2a</i>  | forward | AGCCAAACACAGGCTGATCT      |
|                | reverse | TCCTCATGCTGGTGGGATA       |
| <i>hmcn2</i>   | forward | GGGCTGGTTTCTCTAGTATACCTGT |
|                | reverse | GAACACTTCAGCATCACATGG     |

|               |         |                             |
|---------------|---------|-----------------------------|
| <i>jag1b</i>  | forward | GTGTGGATGGTGAAAACCTGGT      |
|               | reverse | GGGAGAAGACTGACACTCATTTATATT |
| <i>jag2a</i>  | forward | TCTGTCTATACGAACTACGACATGC   |
|               | reverse | ATCTGCAGCATCCATTCCA         |
| <i>jag2b</i>  | forward | GAGAAAAGAGCGCGAGAGAC        |
|               | reverse | GGTTCCCCTGGTTGTTGAC         |
| <i>notch2</i> | forward | ATCGACGAGTGTGTCATTGG        |
|               | reverse | GATGTCCTGCTCACAACGTG        |
| <i>her1</i>   | forward | GCGACTGCGAGAGATCAAG         |
|               | reverse | ATGGCATCTGGGGTCTCC          |
| <i>her2</i>   | forward | TCTTTCCAGCTGAGGAAACC        |
|               | reverse | TGCATTTGTTGATGCGATCT        |
| <i>lim1</i>   | forward | AGTCCGAGAAGAATGCGAAC        |
|               | reverse | GGCCGTAGTACTCGCTTTGA        |
| <i>actin</i>  | forward | GGC TAC AGC TTC ACC ACC A   |
|               | reverse | TGC TGA TCC ACA TCT GCT G   |

---
