# Supplementary material
Source: PubMed Central journal article supplement (PMC11105680)

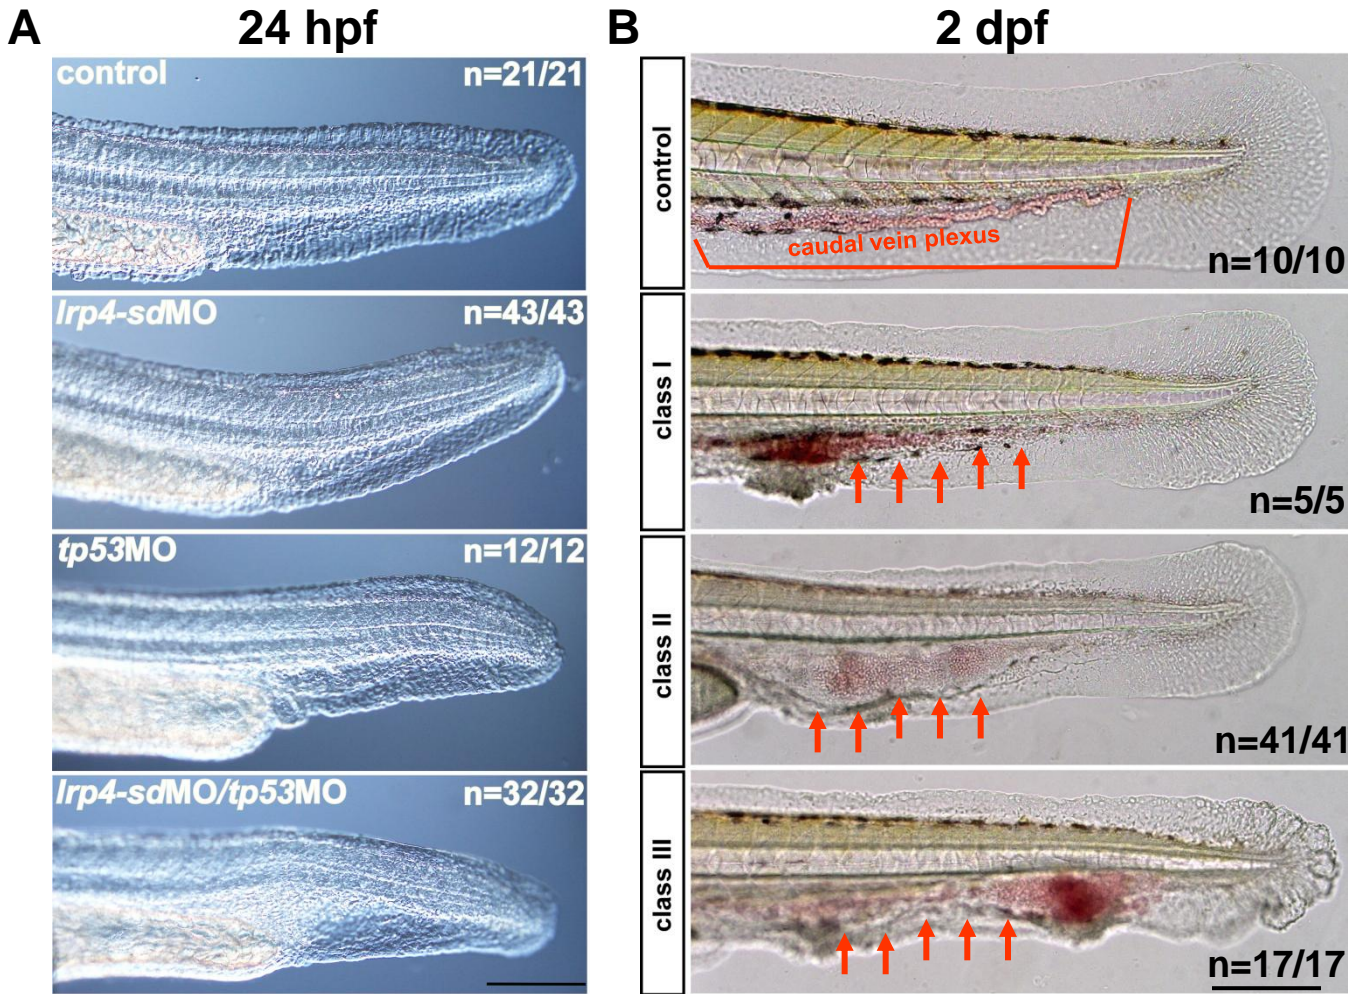

**C** **Acridine orange staining at 2 dpf**

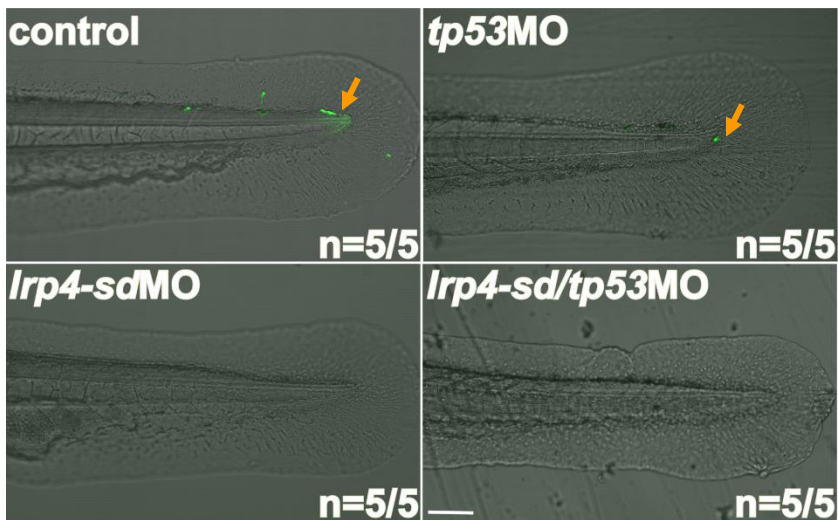

Supplement: 18_2018_2928_MOESM4_ESM.pdf [file 18_2018_2928_MOESM4_ESM.pdf]

**A**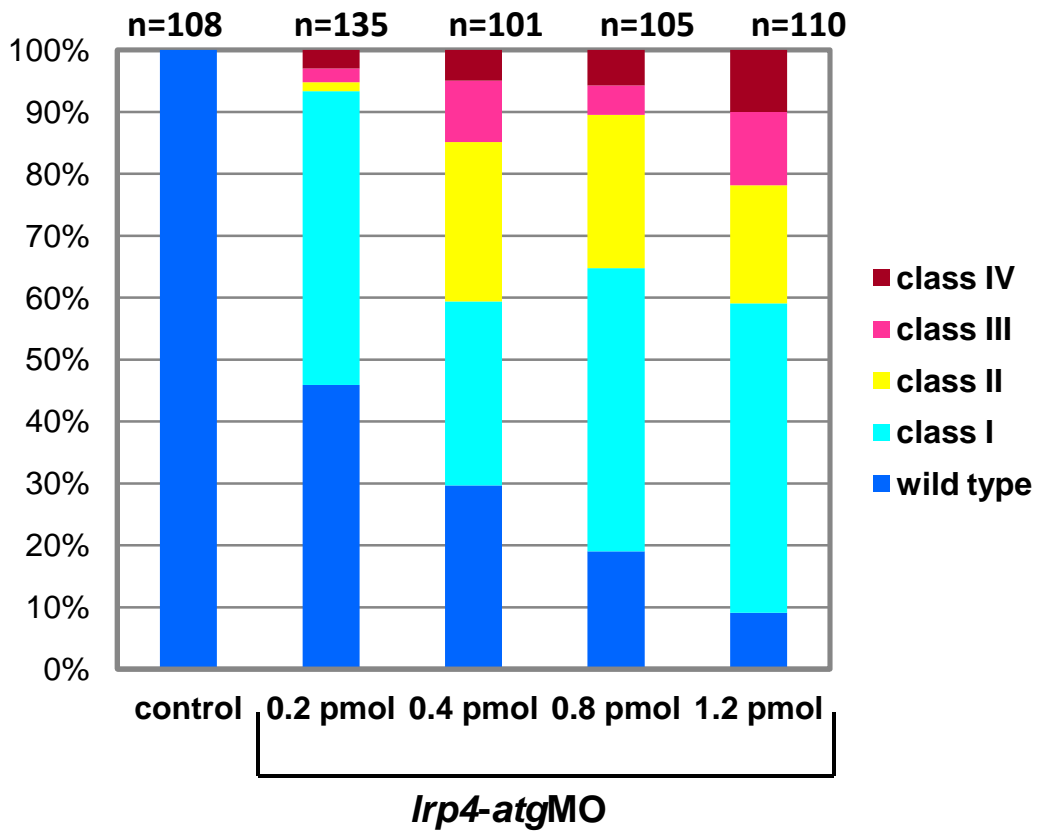**B**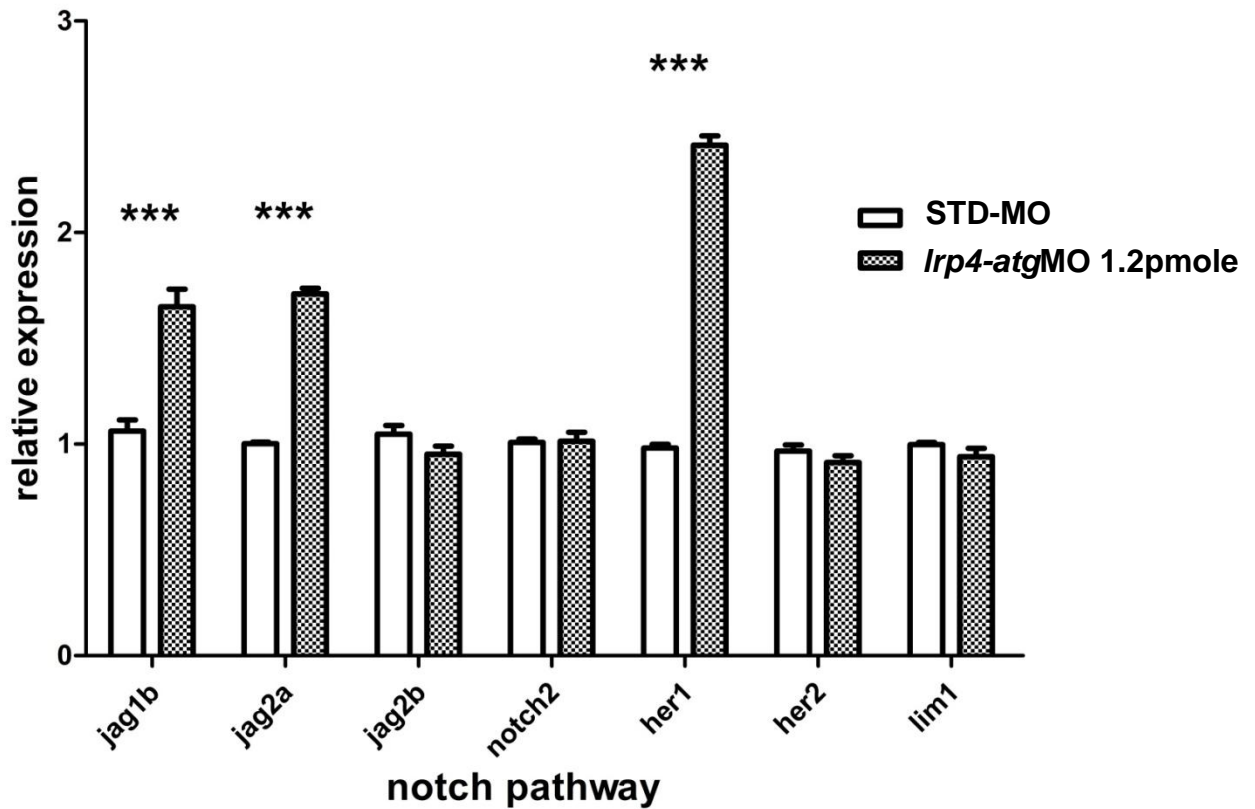

Supplement: 18_2018_2928_MOESM5_ESM.pdf [file 18_2018_2928_MOESM5_ESM.pdf]
